# Supplementary material for: A critical appraisal of the quality of adult musculoskeletal ultrasound guidelines using the AGREE II tool: an EuroAIM initiative
Source: Insights Imaging. 2017 Jul 28;8(5):491–7. doi: 10.1007/s13244-017-0563-4 (PMC5621989; doi:10.1007/s13244-017-0563-4)
Supplement: Supplementary file 5 — (DOCX 20 kb) [file 13244_2017_563_MOESM5_ESM.docx]

Supplementary Table 5 Detailed AGREE II domain scores for the guideline “ACR–AIUM–SPR–SRU Practice Parameter for the Performance of the Musculoskeletal Ultrasound Examination” [13]

| **Domain** | **Item** | **Rater 1** | **Rater 2** | **Rater 3** | **Rater 4** | **Total** | **Total per Domain** | **Domain score** |
| --- | --- | --- | --- | --- | --- | --- | --- | --- |
| Scope and Purpose | ***1*** | 5 | 7 | 6 | 6 | 24 | 69 | **79,2%** |
| ***2*** | 5 | 6 | 6 | 6 | 23 |
| ***3*** | 5 | 6 | 6 | 5 | 22 |
| Stakeholder Involvement | ***4*** | 5 | 6 | 5 | 6 | 22 | 56 | **61,1%** |
| ***5*** | 2 | 2 | 2 | 3 | 9 |
| ***6*** | 6 | 7 | 6 | 6 | 25 |
| Rigour of Development | ***7*** | 4 | 2 | 3 | 2 | 11 | 98 | **34,4%** |
| ***8*** | 3 | 1 | 2 | 3 | 9 |
| ***9*** | 3 | 2 | 3 | 3 | 11 |
| ***10*** | 2 | 2 | 2 | 2 | 8 |
| ***11*** | 4 | 3 | 4 | 3 | 14 |
| ***12*** | 3 | 2 | 2 | 3 | 10 |
| ***13*** | 5 | 7 | 6 | 6 | 24 |
| ***14*** | 4 | 1 | 3 | 3 | 11 |
| Clarity of Presentation | ***15*** | 6 | 6 | 6 | 6 | 24 | 60 | **66,7%** |
| ***16*** | 4 | 5 | 5 | 4 | 18 |
| ***17*** | 3 | 6 | 4 | 5 | 18 |
| Applicability | ***18*** | 3 | 4 | 4 | 3 | 14 | 77 | **63,5%** |
| ***19*** | 5 | 6 | 5 | 6 | 22 |
| ***20*** | 4 | 6 | 5 | 6 | 21 |
| ***21*** | 5 | 5 | 5 | 5 | 20 |
| Editorial Independence | ***22*** | 2 | 1 | 4 | 3 | 10 | 20 | **25,0%** |
| ***23*** | 3 | 2 | 3 | 2 | 10 |
